# Supplementary material
Source: MDPI journal article supplement (https://www.mdpi.com/2075-163X/12/8/961)
Supplement: s1 [file s1]

Archive with 4 entries (4 files):
- minerals-1798430-supplementary.pdf
- Supplementary TableS1.xlsx
- Supplementary TableS2.xlsx
- Supplementary TableS3.xlsx
